# Supplementary material for: Enhancement of electromagnetic interference shielding from the synergism between Cu@Ni nanorods and carbon materials in flexible composite films
Source: Royal Society of Chemistry journal article supplement (doi:10.1039/d0ma00751j), 2020-12-09
Supplement: d0ma00751j1.pdf [file d0ma00751j1.pdf]

**Supplementary Material**

**Enhancement on electromagnetic interference shielding from synergism between  
Cu@Ni nanorods and carbon materials in flexible composite films**

Ruosong Li <sup>1\*</sup>, Shuai Wang <sup>2</sup>, Peiwei Bai <sup>2</sup>, Bingbing Fan <sup>3</sup>, Biao Zhao <sup>2,3\*</sup>, Rui Zhang <sup>2,3</sup>

- 1 School of Chemical Engineering, Northwest University, Xi'an, Shaanxi, 710069, China;
- 2 Henan Key Laboratory of Aeronautical Materials and Application Technology, School of Mechatronics Engineering, Zhengzhou University of Aeronautics, Zhengzhou, Henan, 450046, PR China
- 3 School of Materials Science and Engineering, Zhengzhou University, Zhengzhou, Henan 450001, PR China

\* Corresponding Authors

Dr. Ruosong Li,

E-mail: ruosongli@nwu.edu.cn

Dr. Biao Zhao

E-mail: biao\_zhao@zua.edu.cn

Table S1. The amount of the dissolved PVDF and Cu@Ni in DMF

| Cu@Ni content in composite film (wt%) | 0.6  | 1.2  | 2    | 4    | 6    | 8    |
|---------------------------------------|------|------|------|------|------|------|
| PVDF (g)                              | 8.54 | 8.48 | 8.60 | 8.20 | 8.00 | 7.80 |
| Cu@Ni (g)                             | 0.06 | 0.12 | 0.20 | 0.40 | 0.60 | 0.80 |

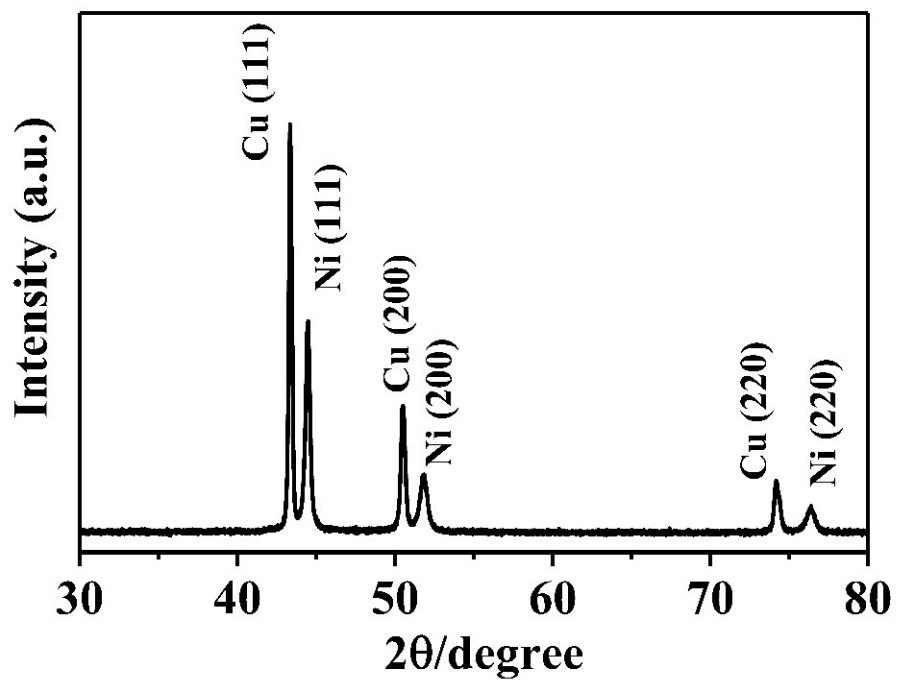

(a)

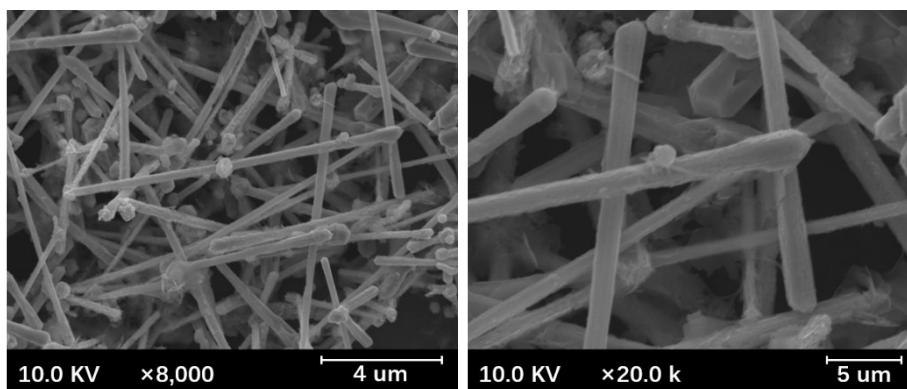

(b)

(c)

Fig. S1. (a) XRD patterns (b-c) and SEM images of the Cu@Ni rods.

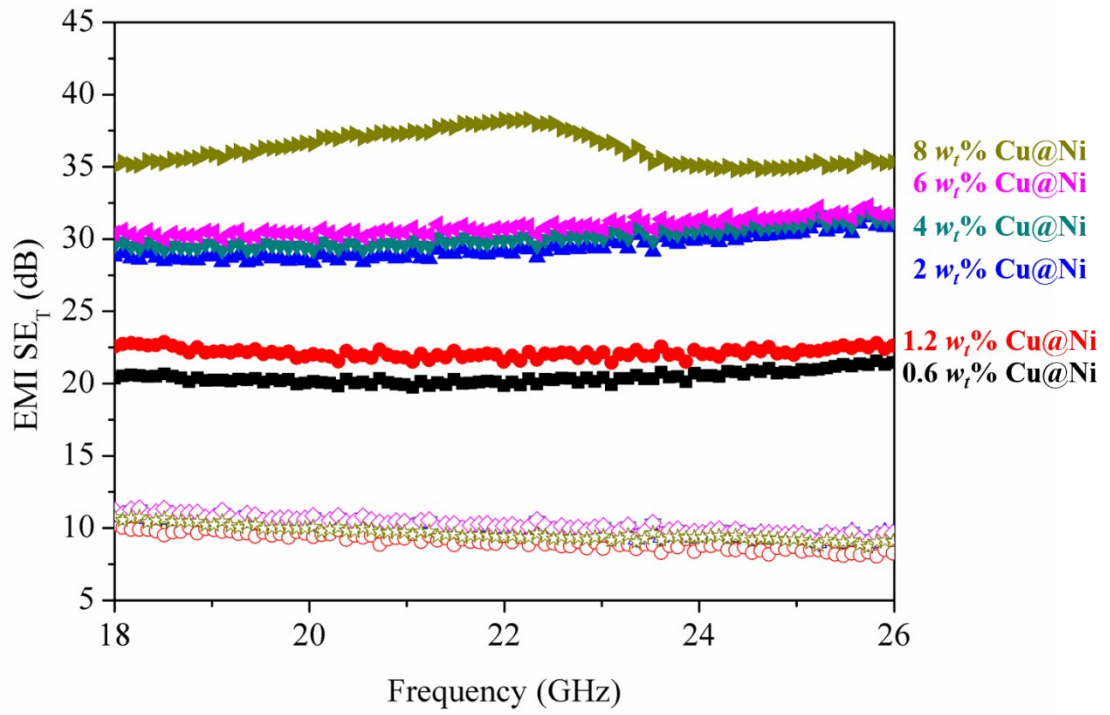

Fig. S2.  $SE_A$  (solid) and  $SE_R$  (hollow) of the composite films at the frequency from 18 GHz to 26 GHz;

Table S2. EMI Shielding Performance of Polymer Composites

| Filler type               | Filler                                           | Matrix      | Filler                                                                                   | SE (dB)     | t (mm)     | Ref.             |
|---------------------------|--------------------------------------------------|-------------|------------------------------------------------------------------------------------------|-------------|------------|------------------|
| Carbon-based filler/metal | <b>CNT/graphene/Cu@Ni</b>                        | <b>PVDF</b> | <b>6 <math>w_i\%</math> CNT/8 <math>w_i\%</math> graphene/8 <math>w_i\%</math> Cu@Ni</b> | <b>47.6</b> | <b>0.3</b> | <b>This work</b> |
|                           | rGO/ $\delta$ -Fe <sub>2</sub> O <sub>3</sub>    | PVA         | 40 $w_i\%$                                                                               | 20.3        | 0.36       | [1]              |
|                           | rGO/CF/ $\gamma$ -Fe <sub>2</sub> O <sub>3</sub> | Resin       | 50 $w_i\%$                                                                               | 41.8        | 0.4        | [2]              |
|                           | rGO/Fe <sub>3</sub> O <sub>4</sub>               | PVA         | 35 $w_i\%$                                                                               | 15          | 0.36       | [3]              |
|                           | Ag/carbon filler                                 | Epoxy       | 4.5 $w_i\%$                                                                              | 38          | 2.5        | [4]              |
| CNT                       | CNT                                              | PVDF        | 5 $w_i\%$                                                                                | 35.4        | 0.4        | [5]              |
|                           | MWCNT                                            | PMMA        | 40 $w_i\%$                                                                               | 27          | 0.165      | [6]              |
|                           | SWCNT                                            | EDOT        | 15 $w_i\%$                                                                               | 58          | 2.8        | [7]              |
|                           | CNT                                              | WPU         | 76.2 $w_i\%$                                                                             | 50          | 2          | [8]              |
|                           | Cellulose/MXCNT                                  | Cellulose   | 15 $w_i\%$                                                                               | 35          | 0.15       | [9]              |
|                           | CNT                                              | PP          | 7.5 $w_i\%$                                                                              | 22.3        | 0.34       | [10]             |
| Graphene                  | Graphene                                         | PI          | 16 $w_i\%$ graphene                                                                      | 21          | 0.8        | [11]             |
|                           | Graphene/CNT                                     | PVDF        | 5 $w_i\%$ CNT<br>10 $w_i\%$ graphene                                                     | 36.5        | 0.25       | [5]              |
| Graphite                  | Graphite                                         | SEBS        | 15 $w_i\%$                                                                               | 20          | 5          | [12]             |
|                           | Graphite                                         | PA66        | 25 $w_i\%$                                                                               | 12          | 3.2        | [13]             |
|                           | Graphite                                         | Epoxy       | 2 $w_i\%$                                                                                | 11          | 2          | [14]             |
|                           | Graphite                                         | PE          | 18.7 $w_i\%$                                                                             | 33          | 3          | [15]             |
| Metals                    | Ag Nanowires                                     | PS          | 2.5 $w_i\%$                                                                              | 33          | 0.8        | [16]             |
|                           | Cu Nanowires                                     | PS          | 2.1 $w_i\%$                                                                              | 35          | 0.2        | [17]             |
|                           | Ni-Co Fiber                                      | WAX         | 30 $w_i\%$                                                                               | 41.2        | 2.5        | [18]             |
|                           | Ni                                               | PVDF        | 40 $w_i\%$                                                                               | 23          | 1.95       | [19]             |

Table S3. SE/t values of various PVDF-based shielding materials

| Polymer matrix | Conductive filler                                          | t (mm)     | SE (dB)     | SE/t (dB·mm <sup>-1</sup> ) | Ref.              |
|----------------|------------------------------------------------------------|------------|-------------|-----------------------------|-------------------|
| PVDF           | <b>6 wt% CNT/8 wt% graphene/8 wt% Cu@Ni</b>                | <b>0.3</b> | <b>47.6</b> | <b>158.8</b>                | <b>This study</b> |
|                | 5 wt% Fe <sub>3</sub> O <sub>4</sub> /8 wt% graphene       | 1.1        | 35.6        | 32.4                        | [20]              |
|                | 10 wt% Ni chain                                            | 2          | 21          | 10.5                        | [21]              |
|                | 1 wt% CNT/6 wt% Ni chain                                   | 0.6        | 57.3        | 95.5                        | [22]              |
|                | 5 wt% graphene nanoplatelets/8 wt% Ni chain                | 0.6        | 55.8        | 93                          | [22]              |
|                | 5 wt% Fe <sub>3</sub> O <sub>4</sub> / wt% 8 CNT           | 1.1        | 32.7        | 29.7                        | [23]              |
|                | 6 wt% CNT/6 wt% Co chain                                   | 0.3        | 35.3        | 117.6                       | [24]              |
|                | 3 wt% CNT/2.2 vol % Co nanowires                           | 1          | 35          | 35                          | [25]              |
|                | 50 wt% bulk Ti <sub>3</sub> C <sub>2</sub> T <sub>x</sub>  | 1          | 34.4<br>9   | 34.49                       | [26]              |
|                | 10 wt% MWCNT/12 wt% Ni@CNT                                 | 0.5        | 46.6        | 93.2                        | [27]              |
|                | 50 vol% carbonyl iron powder                               | 1.2        | 20          | 16.7                        | [28]              |
|                | 2.7 vol.% MWCNT/22 vol.% ethylene-a-octene block copolymer | 2.0        | 34          | 17                          | [29]              |
|                | 1 wt% IL-MWCNT + 2 vol% BT-GO                              | 5.0        | 26          | 5.2                         | [30]              |
|                | 5 wt % CF/15 wt% CB                                        | 4.0        | 30          | 7.5                         | [30]              |
|                | 9.5 wt% Graphene/silicon carbide nanowires (2:1),          | 1.2        | 32.5        | 27.1                        | [32]              |
| PU             | 6.7 wt% MWCNT                                              | 3          | 60          | 20                          | [33]              |
| PLLA           | 10 wt% MWCNT                                               | 2.5        | 23          | 9.2                         | [34]              |
| UHMWPE         | 10 wt% MWCNT                                               | 1          | 50          | 50                          | [35]              |
| Epoxy          | 0.66 wt% 3D CNT                                            | 2          | 33          | 15.5                        | [36]              |
| PMMA           | 20 wt% SWCNT                                               | 4.5        | 30          | 6.7                         | [37]              |
| PDMS           | 0.8 wt% graphene                                           | 1          | 21          | 21                          | [38]              |
| PU foam        | 10 wt% graphene                                            | 60         | 57.7        | 0.96                        | [39]              |
| PS             | 10 wt% functionalized graphene                             | 2.8        | 18          | 6.4                         | [40]              |
| Porous PS      | 30 wt% graphene                                            | 2.5        | 29          | 11.6                        | [41]              |

## References

- [1] B. Yuan, et al., Carbon 75 (2014) 178-189.
- [2] A.P. Singh, et al., Carbon 50 (10) (2012) 3868-3875.
- [3] B.V.B. Rao, P. Yadav, R. Aepuru, H.S. Panda, S. Ogale, S.N. Kale, Phys. Chem. Chem. Phys. 17 (28) (2015) 18353-18363.
- [4] J. Li, S. Qi, M. Zhang, Z. Wang, J. Appl. Polym. Sci. 132 (33) (2015).
- [5] B. Zhao, C. Zhao, R. Li, S.M. Hamidinejad, C.B. Park, ACS Appl. Mater. Inter. 9 (24) (2017) 20873-20884.
- [6] H. Kim, et al., Appl. Phys. Lett. 84 (4) (2004) 589-591.
- [7] M. Farukh, A.P. Singh, S.K. Dhawan, Compos. Sci. Technol. 114 (114) (2015) 94-102.

- [8] Z. Zeng, H. Jin, M. Chen, W. Li, L. Zhou, Z. Zhang, *Adv. Funct. Mater.* 26 (2) (2016) 303-310.
- [9] L. Wang, B.K. Tay, K.Y. See, Z. Sun, L. Tan, D. Lua, *Carbon* 47 (8) (2009) 1905-1910.
- [10] M.H. Al-Saleh, U. Sundararaj, *Carbon* 47 (7) (2009) 1738-1746.
- [11] Y. Li, X. Pei, B. Shen, W. Zhai, L. Zhang, W. Zheng, *RSC Adv.* 4 (63) (2015) 24342-24351.
- [12] S. Kuester, et al., *Compos. Part B.* 84 (84) (2016) 236-247.
- [13] Q.J. Krueger, J.A. King, *Adv. Polym. Tech.* 22 (2) (2003) 96-111.
- [14] G. De Bellis, A. Tamburrano, A. Dinescu, M.L. Santarelli, M.S. Sarto, *Carbon* 49 (13) (2011) 4291-4300.
- [15] V. Panwar, R.M. Mehra, *Polym. Eng. Sci.* 48 (11) (2008) 2178-2187.
- [16] M. Arjmand, A.A. Moud, Y. Li, U. Sundararaj, *RSC Adv.* 5 (70) (2015) 56590-56598.
- [17] M.H. Alsaleh, G.A. Gelves, U. Sundararaj, *Compos. Part A.* 42 (1) (2011) 92-97.
- [18] X. Huang, B. Dai, Y. Ren, J. Xu, P. Zhu, *J. Nanomater.* 2015 (2015) 2.
- [19] H. Gargama, A.K. Thakur, S. Chaturvedi, *J. Appl. Phys.* 117 (22) (2015) 224903.
- [20] H. Cheng, et al., *Compos. Part A.* 121 (2019) 139-148.
- [21] H. Zhang, et al., *Chem. Eng. J.* 379 (2020) 122304.
- [22] B. Zhao, et al., *Carbon* 127 (2018) 469-478.
- [23] I. Arief, S. Biswas, S. Bose, *ACS Appl. Mater. Inter.* 9 (22) (2017) 19202-19214.
- [24] X. Li, et al., *ACS Appl. Mater. Inter.* 10 (47) (2018) 40789-40799.
- [25] M. Sharma, M.P. Singh, C. Srivastava, G. Madras, S. Bose, *ACS Appl. Mater. Inter.* 6 (23) (2014) 21151-21160.
- [26] K. Rajavel, et al., *Compos. Part A.* 129 (2020) 105693.
- [27] S. Zeng, et al., *Carbon* 155 (2019) 34-43.
- [28] N. Joseph, M.T. Sebastian, *Mater. Lett.* 90 (2013) 64-67.
- [29] X. Zha, et al., *Compos. Part A.* 105 (2018) 118-125.
- [30] G.P. Kar, S. Biswas, R. Rohini, S. Bose, *J. Mater. Chem. A* 3 (15) (2015) 7974-7985.
- [31] J. Song, Q. Yuan, H. Zhang, B. Huang, F. Fu, *J. Polym. Res.* 22 (8) (2015).
- [32] C. Liang, M. Hamidinejad, L. Ma, Z. Wang, C.B. Park, *Carbon* 156 (2020) 58-66.
- [33] C. Zhang, Q. Ni, S. Fu, K. Kurashiki, *Compos. Sci. Technol.* 67 (14) (2007) 2973-2980.
- [34] T. Kuang, et al., *Carbon* 105 (2016) 305-313.
- [35] M.H. Al-Saleh, *Synthetic Met.* 205 (2015) 78-84.
- [36] Y. Chen, H. Zhang, Y. Yang, M. Wang, A. Cao, Z. Yu, *Adv. Funct. Mater.* 26 (3) (2016) 447-455.
- [37] N.C. Das, Y. Liu, K. Yang, W. Peng, S. Maiti, H. Wang, *Polym. Eng. Sci.* 49 (8) (2009) 1627-1634.
- [38] Z. Chen, C. Xu, C. Ma, W. Ren, H. Cheng, *Adv. Mater.* 25 (9) (2013) 1296-1300.
- [39] B. Shen, Y. Li, W. Zhai, W. Zheng, *ACS Appl. Mater. Inter.* 8 (12) (2016) 8050-8057.
- [40] C. Li, et al., *Polym. Int.* 62 (7) (2013) 1077-1084.
- [41] D. Yan, P. Ren, H. Pang, Q. Fu, M. Yang, Z. Li, *J. Mater. Chem.* 22 (36) (2012) 18772.
